# Supplementary material for: The role of supercritical carbon dioxide for recovery of shale gas and sequestration in gas shale reservoirs
Source: Royal Society of Chemistry journal article supplement (doi:10.1039/d0ee03648j), 2021-01-01
Supplement: d0ee03648j1.pdf [file d0ee03648j1.pdf]

## Supplementary information: The role of supercritical carbon dioxide for recovery of shale gas and sequestration in gas shale reservoirs

Qiao Lyu,<sup>a</sup> Jingqiang Tan,<sup>\*a</sup> Lei Li,<sup>a</sup> Yiwen Ju,<sup>\*b</sup> Andreas Busch,<sup>c</sup> David A. Wood,<sup>d</sup> Pathegama Gamage Ranjith,<sup>e</sup> Richard Middleton,<sup>f</sup> Biao Shu,<sup>a</sup> Chenger Hu,<sup>a</sup> Zhanghu Wang<sup>a</sup> and Ruining Hua

a. Key Laboratory of Metallogenic Prediction of Nonferrous Metals and Geological Environment Monitoring, School of Geosciences and Info-physics, Central South University, Changsha 410083, China

b. Key Laboratory of Computational Geodynamics, College of Earth and Planetary Sciences, University of Chinese Academy of Sciences, Beijing, 100049, China

c. The Lyell Centre, Institute of GeoEnergy Engineering, Heriot-Watt University, Edinburgh, EH14 4AS, United Kingdom

d. DWA Energy Limited, Lincoln, LN5 9JP, United Kingdom

e. Deep Earth Energy Lab, Department of Civil Engineering, Monash University, Melbourne, 3800, Australia

f. Carbon Solutions LLC, NM 87545, USA

\*Corresponding author: Jingqiang Tan (tanjingqiang@csu.edu.cn); Yiwen Ju(juyw03@163.com)

This supplementary information provides details and supporting material to the main text.

Classification of CO<sub>2</sub> storage projects.<sup>1-3</sup>

| Project (location)                   | CO <sub>2</sub> -source               | Type of storage         | Amount of CO <sub>2</sub>    |
|--------------------------------------|---------------------------------------|-------------------------|------------------------------|
| Terrell Natural Gas Processing (USA) | Natural gas processing                | Natural oil field (EOR) | 0.5 Mt per year (since 1972) |
| Enid Fertilizer (USA)                | Koch Nitrogen's Enid Fertilizer Plant | Natural oil field (EOR) | 0.7 Mt per year (since 1982) |
| Shute Creek Gas Plant (USA)          | Natural gas processing                | Natural oil field (EOR) | 7 Mt per year (since 1986)   |
| Great Plains Synfuels Plant (USA)    | Coal                                  | Natural oil field (EOR) | 3 Mt per year (since 2000)   |
| Century Plant (USA)                  | Natural gas processing                | Natural oil field (EOR) | 8.4 Mt per year (since 2010) |
| Air Products SMR (USA)               | Existing steam-methane reformers      | Natural oil field (EOR) | 1 Mt per year (since 2013)   |
| Coffeyville Gasification (USA)       | Fertilizer                            | Natural oil field (EOR) | 1 Mt per year (since 2013)   |
| Lost Cabin Gas Plant (USA)           | Natural gas processing                | Natural oil field (EOR) | 0.9 Mt per year (since 2013) |
| Petra Nova (WA)                      | Coal-fired power                      | Natural oil field       | 1.4 Mt per year (since       |

---

|                                                                                  |                                          |                                  |                                  |
|----------------------------------------------------------------------------------|------------------------------------------|----------------------------------|----------------------------------|
| Parish) (USA)                                                                    | generation                               | (EOR)                            | 2017)                            |
| Petrobras Santos Basin (Brazil)                                                  | Natural gas processing                   | Natural oil field (EOR)          | 1-3 Mt per year (since 2013)     |
| Boundary Dam (Canada)                                                            | Coal-fired power                         | Natural oil field (EOR)          | 1 Mt per year (since 2014)       |
| Uthmaniyah (Saudi Arabia)                                                        | Natural gas processing                   | Natural oil field (EOR)          | 0.8 Mt per year (since 2015)     |
| Abu Dhabi CCS (United Arab Emirates)                                             | Steel production                         | Natural oil field (EOR)          | 0.8 Mt per year (since 2016)     |
| CNPC Jilin Oil Field CO <sub>2</sub> EOR (China)                                 | Natural gas processing                   | Natural oil field (EOR)          | 0.6 Mt per year (since 2018)     |
| Alberta Carbon Trunk Line with Sturgeon Refinery CO <sub>2</sub> Stream (Canada) | Petcoke gasification plants for hydrogen | Natural oil field (EOR)          | 1.2-1.4 Mt per year (since 2019) |
| Alberta Carbon Trunk Line with Agrim CO <sub>2</sub> Stream                      | Agrium fertilizer plant                  | Natural oil field (EOR)          | 0.3-0.6 Mt per year (since 2019) |
| In Salah (Algeria)                                                               | Natural gas processing                   | Natural gas field/saline aquifer | 1.2 Mt per year (since 2004)     |
| Weyburn (Canada/USA)                                                             | Coal                                     | Natural oil field (EOR)          | 1 Mt per year (since 2000)       |
| K12b (Netherlands)                                                               | Natural gas processing                   | Natural gas field (EGR)          | 0.1 kt per year (since 2004)     |
| Otway (Australia)                                                                | Natural gas processing                   | Depleted gas field               | 50 kt per year (2007–2009)       |
| Snohvit (Norway-offshore)                                                        | Natural gas processing                   | Natural gas field/saline aquifer | 0.75 kt per year (since 2007)    |
| Lacq (France)                                                                    | Oxyfuel power station                    | Depleted gas field               | 0.15 Mt (2010–2012)              |

---

## Reference

1. IEA, *CO<sub>2</sub> Capture and Storage*, IEA/OECD, Paris, 2008.
2. N. Tanaka, *Energy Technology Perspectives 2008—scenarios and strategies to 2050*, International Energy Agency (IEA), Paris, 2008.
3. P. Markewitz, W. Kuckshinrichs, W. Leitner, J. Linssen, P. Zapp, R. Bongartz, A. Schreiber and T. E. Müller, *Energ Environ Sci*, 2012, **5**, 7281-7305.
